# Supplementary material
Source: publisher figshare collection journal article supplement (https://frontiersin.figshare.com/ndownloader/files/27375044)
Supplement: Supplementary file [file 27375044]

## Supplementary Material

### **Tiliroside Ameliorates Ulcerative Colitis by Restoring M1/M2 Macrophage Balance via HIF-1 $\alpha$ /glycolysis Pathway**

Hongda Zhuang<sup>1,†</sup>, Qi Lv<sup>2,1†</sup>, Chao Zhong<sup>1,3</sup>, Yaru Cui<sup>1</sup>, Luling He<sup>1</sup>, Cheng Zhang<sup>3</sup>, Jun Yu<sup>3,\*</sup>

<sup>1</sup>*Translational Medicine Centre, Jiangxi University of Traditional Chinese Medicine, Nanchang, Jiangxi, 330002, China.*

<sup>2</sup>*Jiangsu Key Laboratory for Functional Substance of Chinese Medicine, State Key Laboratory Cultivation Base for TCM Quality and Efficacy, School of Pharmacy, Nanjing University of Chinese Medicine, Nanjing, 210023, China.*

<sup>3</sup>*Center for Metabolic Disease Research and Department of Physiology, Lewis Katz School of Medicine, Temple University, Philadelphia, PA 19140, USA*

<sup>†</sup>*These authors contributed equally to this work.*

**\* Correspondence:**

*Jun Yu, MD.*

*Center for Metabolic Disease Research and Department of Physiology,  
Lewis Katz School of Medicine, Temple University,  
3500 North Broad Street,  
Philadelphia, PA 19140, USA  
Email: jun.yu@temple.edu*

**Supplementary Tables 1. Primers used for RT-PCR**

| Primers         | NCBI GeneID | Source |         | Sequence (5'→3')        |
|-----------------|-------------|--------|---------|-------------------------|
| <i>β-actin</i>  | 11461       | mouse  | Forward | CTACCTCATGAAGATCCTGACC  |
|                 |             |        | Reverse | CACAGCTTCTCTTTGATGTCAC  |
| <i>Tnf-α</i>    | 21926       | mouse  | Forward | CCCTCACACTCAGATCATCTTCT |
|                 |             |        | Reverse | GCTACGACGTGGGCTACAG     |
| <i>Il-1β</i>    | 16176       | mouse  | Forward | GCAACTGTTCTGAACTCAACT   |
|                 |             |        | Reverse | ATCTTTTGGGGTCCGTCAACT   |
| <i>Inos</i>     | 18126       | mouse  | Forward | GTTCTCAGCCCAACAATACAAGA |
|                 |             |        | Reverse | GTGGACGGGTCGATGTCAC     |
| <i>Arg1</i>     | 11846       | mouse  | Forward | CTCCAAGCCAAAGTCCTTAGAG  |
|                 |             |        | Reverse | AGGAGCTGTCATTAGGGACATC  |
| <i>Ym1</i>      | 12655       | mouse  | Forward | CAGGTCTGGCAATTCTTCTGAA  |
|                 |             |        | Reverse | GTCTTGCTCATGTGTGTAAGTGA |
| <i>Cd206</i>    | 17533       | mouse  | Forward | CTCTGTTCAGCTATTGGACGC   |
|                 |             |        | Reverse | CGGAATTTCTGGGATTGAGCTTC |
| <i>Glut1</i>    | 20525       | mouse  | Forward | GCTTCCTGCTCATCAATCGT    |
|                 |             |        | Reverse | CGACCCTCTTCTTTCATCTCC   |
| <i>Eno1</i>     | 13806       | mouse  | Forward | TGCGTCCACTGGCATCTAC     |
|                 |             |        | Reverse | CAGAGCAGGCGCAATAGTTTTA  |
| <i>Pkm</i>      | 18746       | mouse  | Forward | AGACGGTGGACATAGTTGGC    |
|                 |             |        | Reverse | TTTGCTGATGTTTTGCTTGC    |
| <i>Pdk1</i>     | 228026      | mouse  | Forward | GGACTTCGGGTCAGTGAATGC   |
|                 |             |        | Reverse | TCCTGAGAAGATTGTCGGGGA   |
| <i>Aldolase</i> | 11676       | mouse  | Forward | AAGGCTGCTCCATCAACACT    |
|                 |             |        | Reverse | CACAGACAACACCGCACAC     |
| <i>Ldha</i>     | 16828       | mouse  | Forward | CAAAGACTACTGTGTAAGTGC   |
|                 |             |        | Reverse | TGGACTGTACTTGACAATGTTGG |
| <i>Pgam</i>     | 18648       | mouse  | Forward | CAGGTAAAGATCTGGAGACGAT  |
|                 |             |        | Reverse | CTTGCTGATGTTGCTGTAGAAG  |
| <i>Pfk</i>      | 18642       | mouse  | Forward | GATGTTGTAGGTGCGGAGATTC  |
|                 |             |        | Reverse | ACGGTATACATCGTGCATGAT   |
| <i>Gapdh</i>    | 14433       | mouse  | Forward | AAATGGTGAAGGTCGGTGTG    |
|                 |             |        | Reverse | TGAAGGGGTCGTTGATGG      |
| <i>Hif-1α</i>   | 112405      | mouse  | Forward | ACCTTCATCGGAACTCCAAAG   |
|                 |             |        | Reverse | ACTGTTAGGCTCAGGTGAACT   |
| <i>Tlr4</i>     | 21898       | mouse  | Forward | GCAAACGCTGTTCTGCTCAG    |
|                 |             |        | Reverse | AGGCGTCTCCCTCTATTGTATT  |
| <i>Cd14</i>     | 12475       | mouse  | Forward | CTCTGTCCTTAAAGCGGCTTAC  |
|                 |             |        | Reverse | GTTGCGGAGGTTCAAGATGTT   |
| <i>Ifngr</i>    | 15979       | mouse  | Forward | CTGGCAGGATGATTCTGCTGG   |
|                 |             |        | Reverse | GCATACGACAGGGTTCAAGTTAT |
| <i>Cd36</i>     | 12491       | mouse  | Forward | ATGGGCTGTGATCGGAACTG    |
|                 |             |        | Reverse | GTCTTCCAATAAGCATGTCTCC  |
| <i>Ap2</i>      | 11770       | mouse  | Forward | AAATCACCGCAGACGACAG     |
|                 |             |        | Reverse | TCATAACACATTCCACCACCA   |
| <i>Cdh1</i>     | 21872       | mouse  | Forward | CAGTTCCGAGGTCTACACCTT   |
|                 |             |        | Reverse | TGAATCGGGAGTCTTCCGAAAA  |
| <i>Cldn7</i>    | 53624       | mouse  | Forward | GGCCTGATAGCGAGCACTG     |
|                 |             |        | Reverse | GTGACGCACTCCATCCAGA     |

|                                 |       |       |         |                          |
|---------------------------------|-------|-------|---------|--------------------------|
| <i>Ocln</i>                     | 18260 | mouse | Forward | TTGAAAGTCCACCTCCTTACAGA  |
|                                 |       |       | Reverse | CCGGATAAAAAGAGTACGCTGG   |
| <i><math>\beta</math>-actin</i> | 60    | human | Forward | CATGTACGTTGCTATCCAGGC    |
|                                 |       |       | Reverse | CTCCTTAATGTCACGCACGAT    |
| <i>Tnf-<math>\alpha</math></i>  | 7124  | human | Forward | CCTCTCTCTAATCAGCCCTCTG   |
|                                 |       |       | Reverse | GAGGACCTGGGAGTAGATGAG    |
| <i>IL-1<math>\beta</math></i>   | 3553  | human | Forward | TTCGACACATGGGATAACGAGG   |
|                                 |       |       | Reverse | TTTTTGCTGTGAGTCCCGGAG    |
| <i>Inos</i>                     | 4843  | human | Forward | GACTTTCCAAGACACACTTCAC   |
|                                 |       |       | Reverse | TTCGATAGCTTGAGGTAGAAGC   |
| <i>Arg1</i>                     | 383   | human | Forward | GGACCTGCCCTTTGCTGACATC   |
|                                 |       |       | Reverse | TCTTCTTGACTTCTGCCACCTTGC |
| <i>Cd206</i>                    | 4360  | human | Forward | GACGTGGCTGTGGATAAATAAC   |
|                                 |       |       | Reverse | CAGAAGACGCATGTAAAGCTAC   |
| <i>Ccl18</i>                    | 6362  | human | Forward | AGATCATTTACACAATGCTGGC   |
|                                 |       |       | Reverse | TAAAGTCACCAAAAGGCTTTCG   |

## Supplementary Figure S1

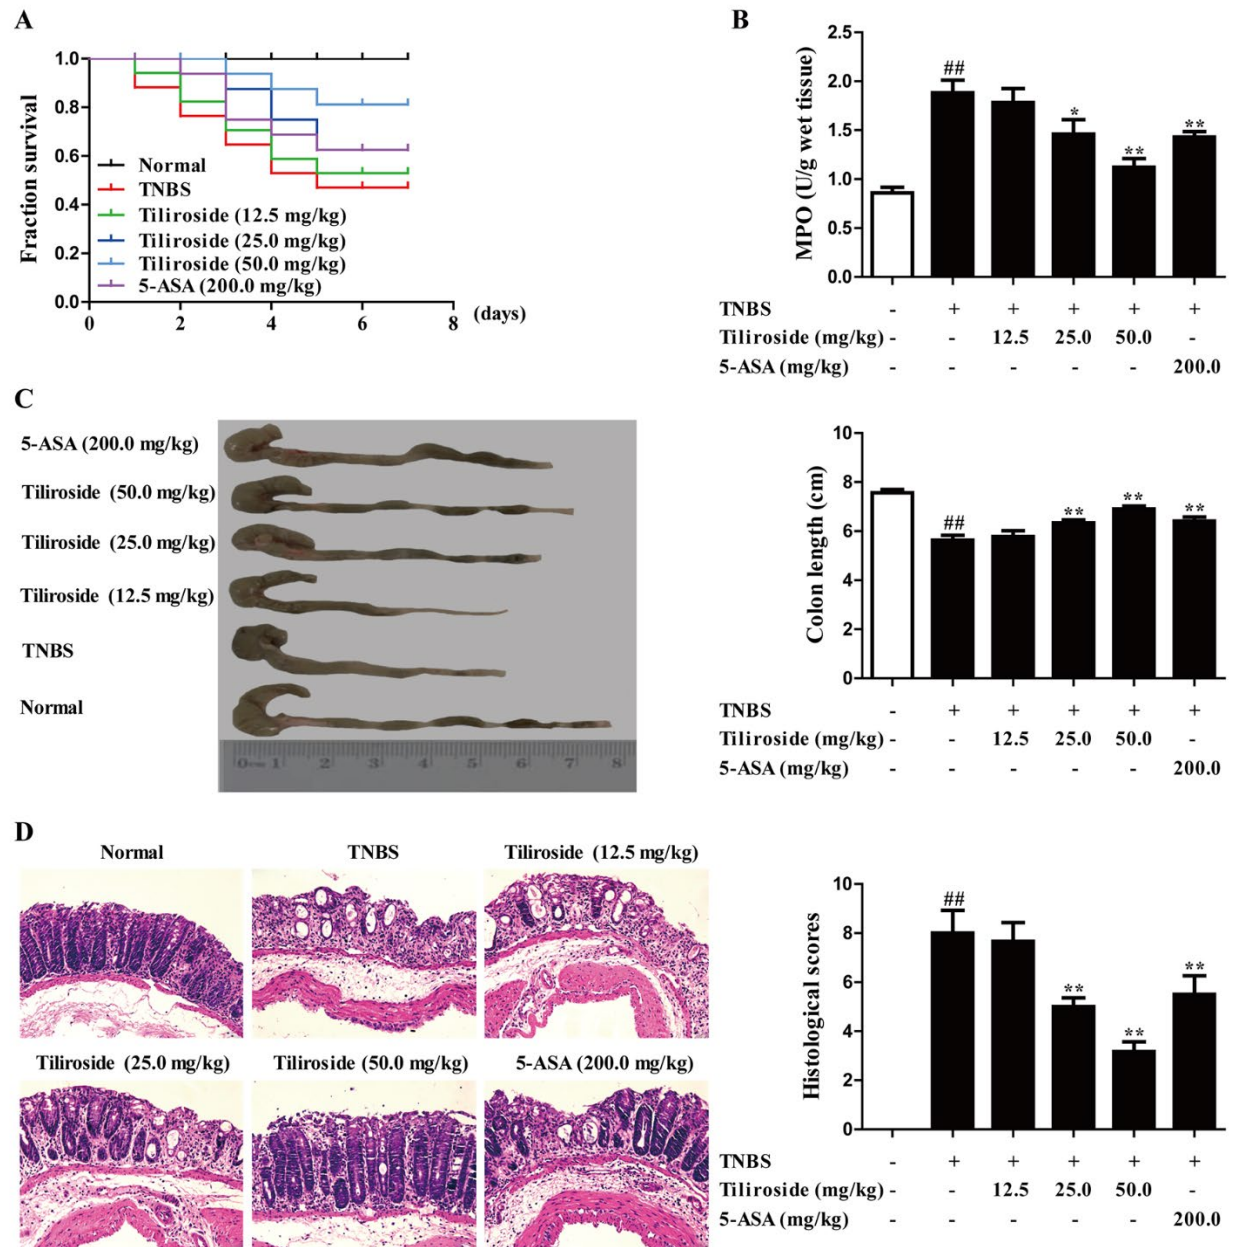

**Supplementary Figure S1. Tiliroside alleviates TNBS-induced colitis in mice.** The male BALB/c mice were challenged with TNBS, tiliroside (12.5, 25, 50 mg/kg) and 5-ASA (200 mg/kg) were orally administered daily from day 0 to day 7. (A) Fraction survival; (B) the MPO activity in colons; (C) the colon length; (D) the histological changes of colons were detected. Data were expressed as means  $\pm$  S.E.M of fifteen mice in each group. <sup>##</sup> $P < 0.01$  vs. Normal group. <sup>\*</sup> $P < 0.05$  and <sup>\*\*</sup> $P < 0.01$  vs. TNBS group.

## Supplementary Figure S2

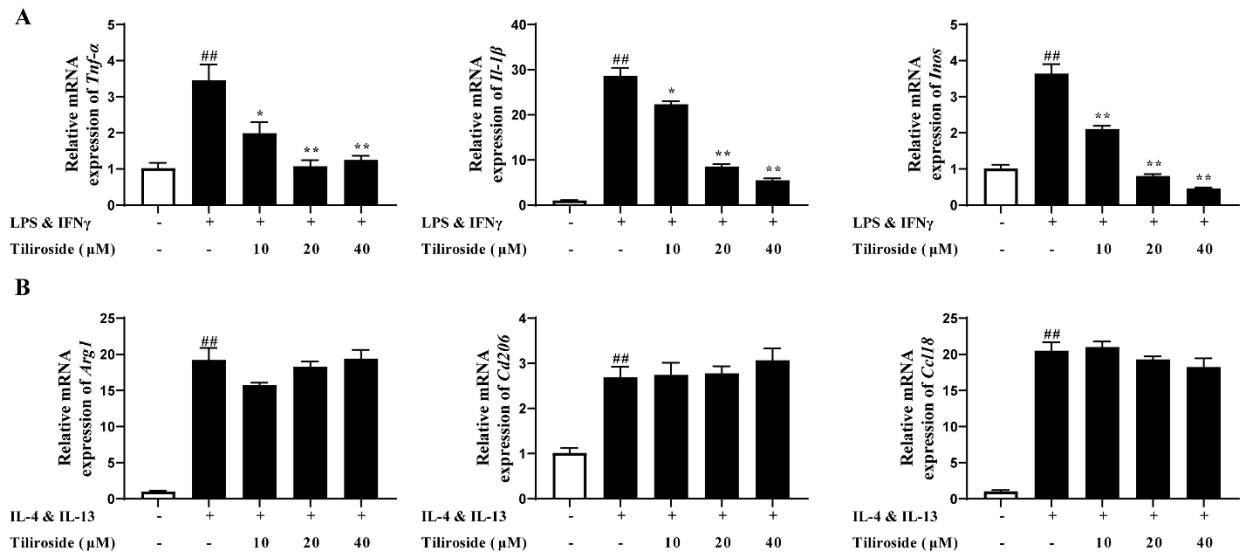

## Supplementary Figure 2. Tiliroside dampens the polarization of M1 macrophage *in vitro*.

(A, B) The PMA-differentiated THP-1 cells were treated with tiliroside (10, 20, 40  $\mu$ M) in the presence or absence of LPS (100 ng/mL) and IFN- $\gamma$  (20 ng/mL) or IL-4 (20 ng/mL), respectively. The mRNA expressions of M1-and M2-marker genes were detected by using the qPCR assay. Data were expressed as means  $\pm$  S.E.M of three independent experiments *in vitro*. <sup>#</sup> $P < 0.05$  and <sup>##</sup> $P < 0.01$  vs. Normal group; <sup>\*</sup> $P < 0.05$  and <sup>\*\*</sup> $P < 0.01$  vs. LPS & IFN- $\gamma$  group.

### Supplementary Figure S3

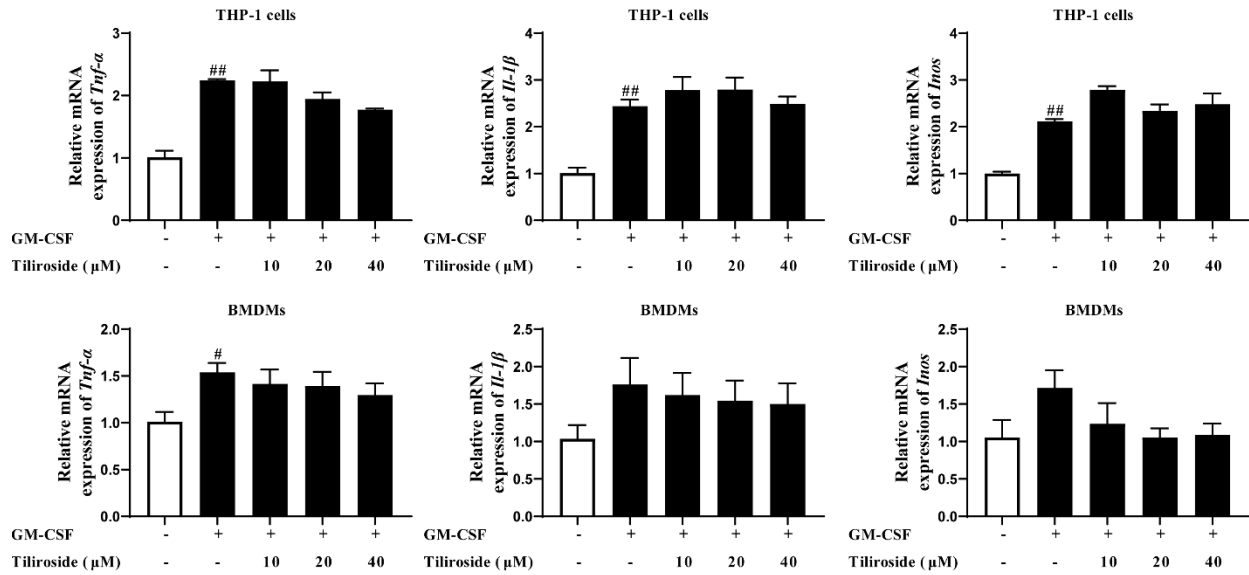

**Supplementary Figure S3. The effect of tiliroside on the GM-CSF-mediated M1 macrophage polarization.** The BMDMs and PMA-differentiated THP-1 cells were treated with the tiliroside (10, 20, 40 μM) for 24 h in the presence of GM-CSF (100 ng/mL). The mRNA expressions of *Tnf-α*, *Il-1β* and *Inos* were detected by using the qPCR assay. Data were expressed as means ± S.E.M of three independent experiments *in vitro*. #*P*<0.05 and ##*P*<0.01 vs. Normal group.

## Supplementary Figure S4

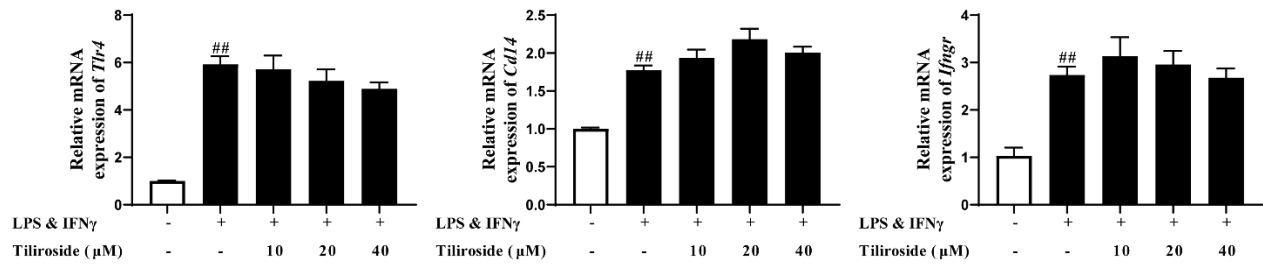

**Supplementary Figure S4. Tiliroside exerts little influence on the mRNA expression of *Cd14*, *Tlr4* and *Ifngr*.** The BMDMs were treated with tiliroside ((10, 20, 40  $\mu$ M) in the presence or absence of LPS (100 ng/mL) and IFN-  $\gamma$  (20 ng/mL), the mRNA expression of *Cd14*, *Tlr4* and *Ifngr* were detected by using qPCR analysis. Data were expressed as means  $\pm$  S.E.M of three independent experiments *in vitro*. <sup>#</sup> $P < 0.05$  and <sup>##</sup> $P < 0.01$  vs. Normal group; \* $P < 0.05$  and \*\* $P < 0.01$  vs. LPS & IFN- $\gamma$  group.

## Supplementary Figure S5

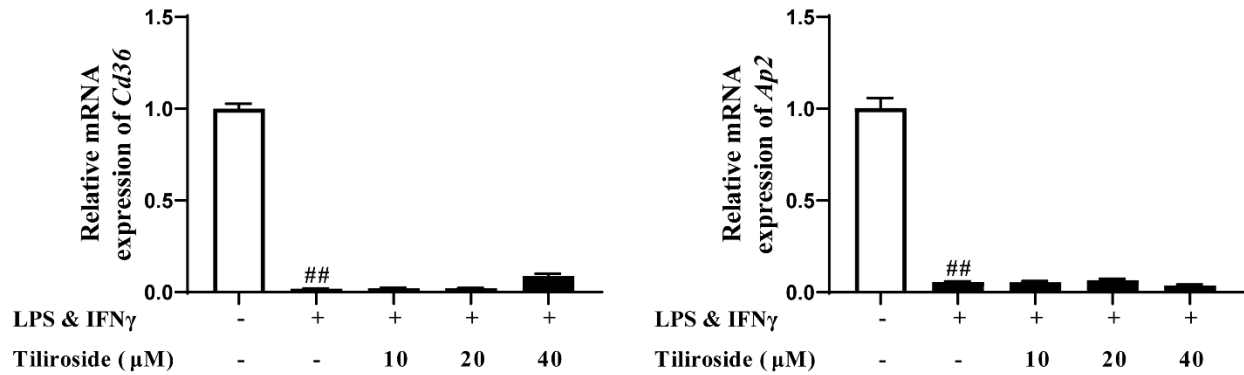

**Supplementary Figure S5. Tiliroside exerts little effect on the PPAR $\gamma$  activation in macrophages.** The BMDMs were treated with tiliroside (10, 20, 40  $\mu$ M) in the presence or absence of LPS (100 ng/mL) and IFN- $\gamma$  (20 ng/mL) for 24 h. The mRNA expressions of *Ap2* and *Cd36* was detected by using the qPCR assay. Data were expressed as means  $\pm$  S.E.M of three independent experiments *in vitro*. <sup>#</sup> $P < 0.05$  and <sup>##</sup> $P < 0.01$  vs. Normal group; <sup>\*</sup> $P < 0.05$  and <sup>\*\*</sup> $P < 0.01$  vs. LPS & IFN- $\gamma$  group.
